# Supplementary material for: Upper tropospheric cloud systems derived from IR sounders: properties of cirrus anvils in the tropics
Source: Copernicus journal article supplement (doi:10.5194/acp-17-3845-2017), 2017-03-21
Supplement: Supplementary file 1 [file acp-17-3845-2017-supplement.pdf]

Supplement of Atmos. Chem. Phys., 17, 3845–3859, 2017  
<http://www.atmos-chem-phys.net/17/3845/2017/>  
doi:10.5194/acp-17-3845-2017-supplement  
© Author(s) 2017. CC Attribution 3.0 License.

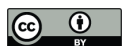

*Supplement of*

## **Upper tropospheric cloud systems derived from IR sounders: properties of cirrus anvils in the tropics**

**Sofia E. Protopapadaki et al.**

*Correspondence to:* Sofia E. Protopapadaki (sprotopap@lmd.polytechnique.fr)

The copyright of individual parts of the supplement might differ from the CC-BY 3.0 licence.

Supplement on regional analysis

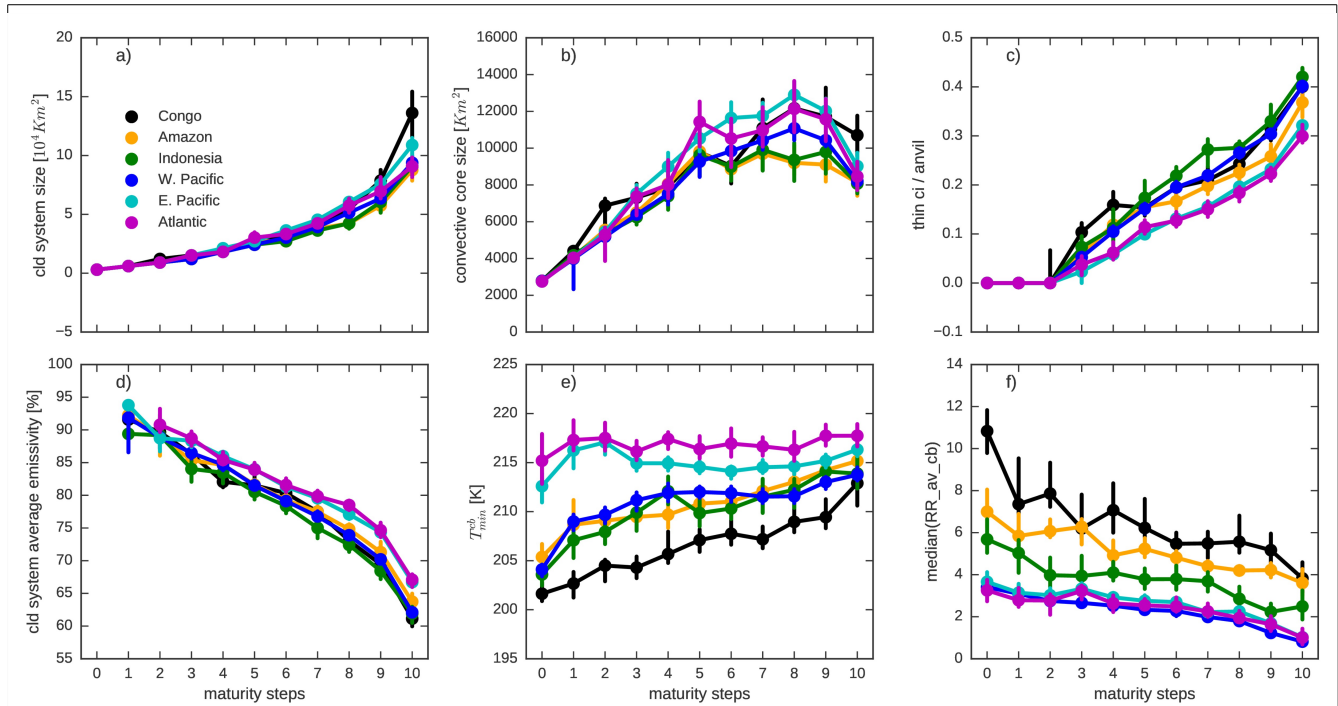

*Illustration 1: Median values and standard errors of physical properties for single-core convective systems for eleven maturity steps defined by the fraction of convective area [1, 0.78, 0.65, 0.55, 0.47, 0.40, 0.34, 0.29, 0.24, 0.19, 0.13, 0.01], separately over six regions as in Lio and Zipser 2008 : a) cloud system size, b) convective core size, c) thin cirrus over cirrus area, d) cloud system average emissivity, e) minimum temperature within convective core, f) average convective core rain rate.*

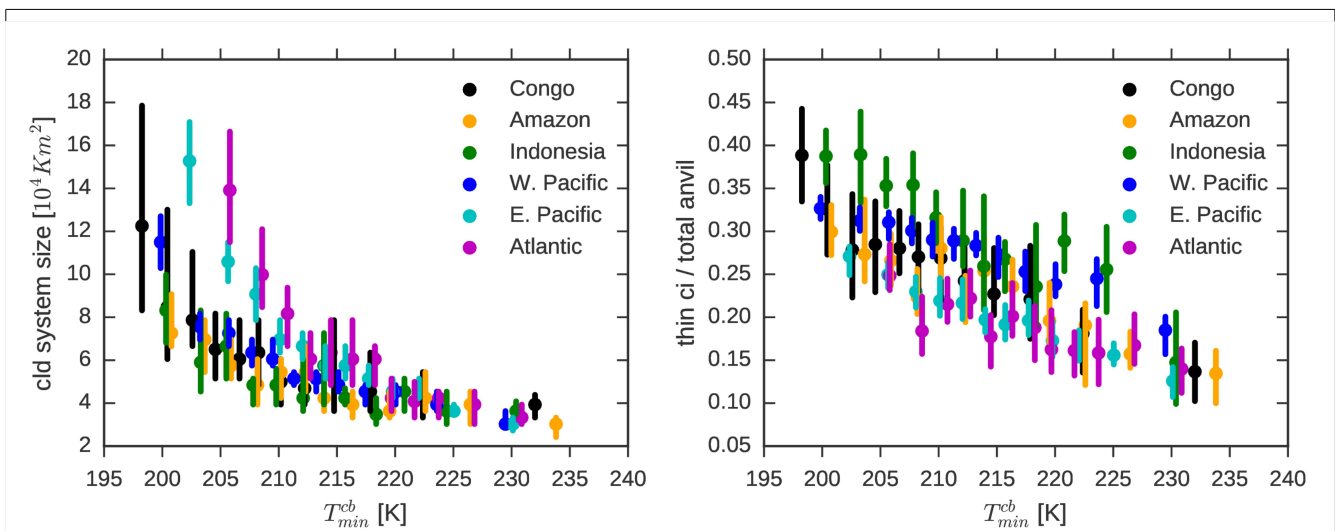

*Illustration 2: Median values and standard errors of horizontal extent (left) and ratio of thin cirrus over total anvil (right) versus minimum temperature within convective core, separately over six regions, for mature single core systems.*
